# Supplementary material for: A high-resolution 3D radiochromic hydrogel photonic crystal dosimeter for clinical radiotherapy
Source: Royal Society of Chemistry journal article supplement (doi:10.1039/d4mh01235f), 2024-11-12
Supplement: d4mh01235f1.pdf [file d4mh01235f1.pdf]

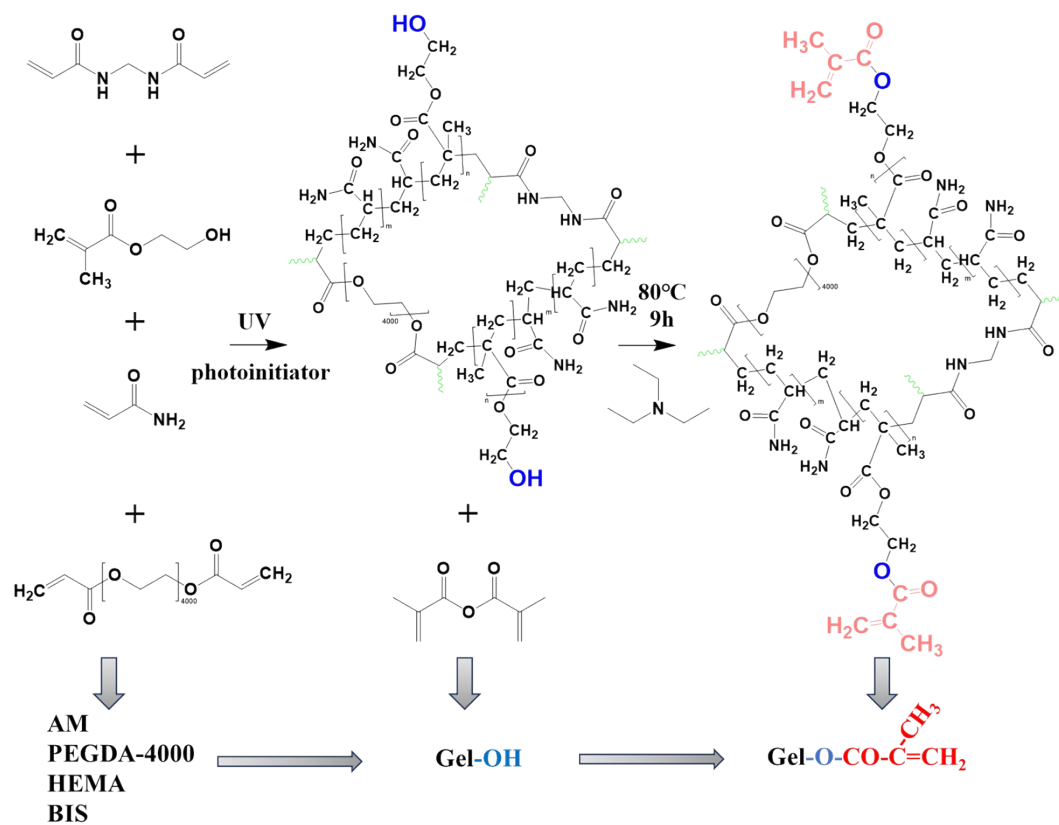

Figure S1. Reaction mechanisms of inverse opal film polymerization and modification.

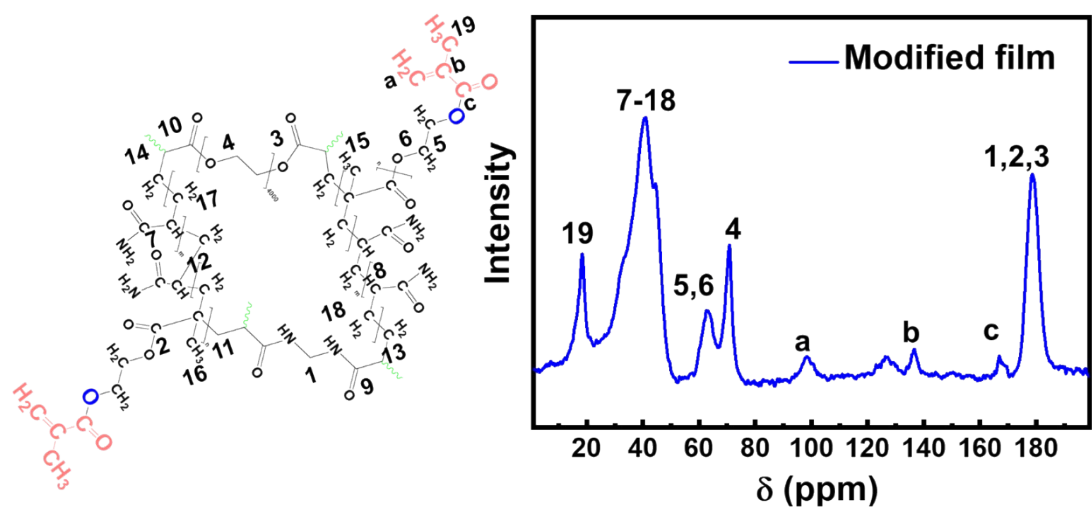

**Figure S2.** Chemical formulae and  $^{13}\text{C}$  NMR of modified film.

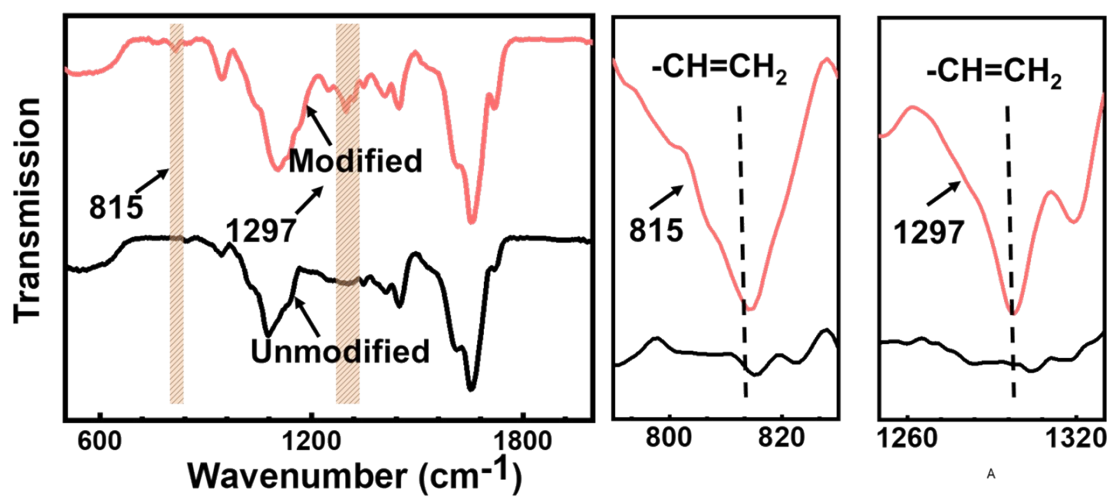

**Figure S3.** FT-IR of modified films and unmodified film (815 -C=CH<sub>2</sub> CH Out-of-plane bending vibration; 1297 -C=CH<sub>2</sub> in-plane bending vibration).

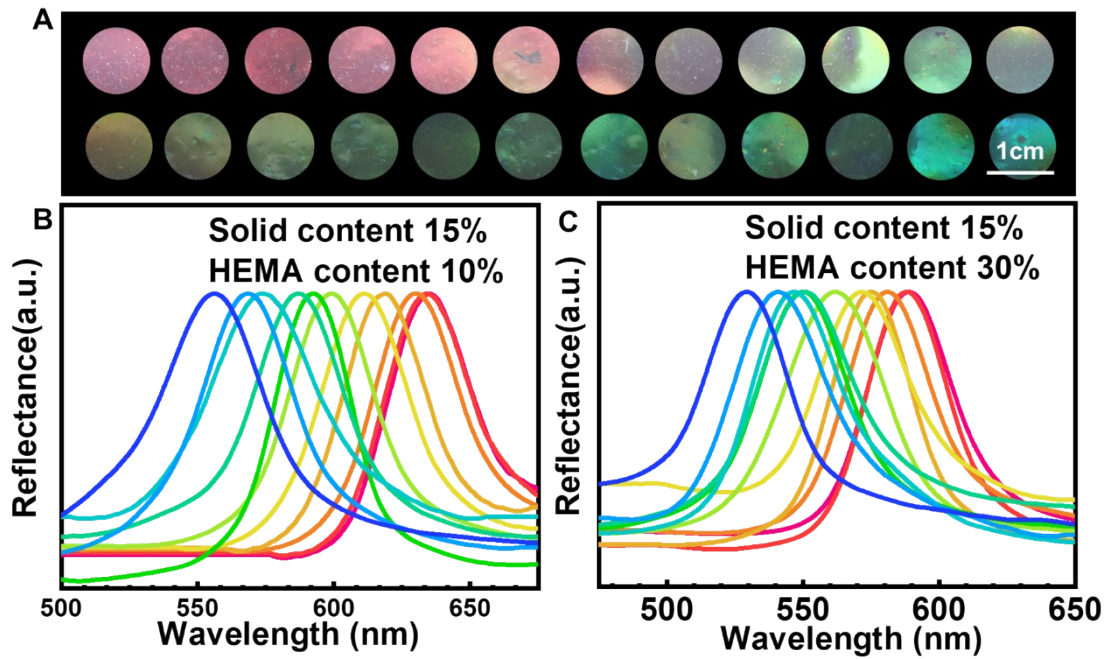

**Figure S4.** **A** Photographs of inverse opal films with solid content of 20% and acrylic groups content of 10% and 30% at different absorbed doses; **B** Spectra of inverse opal films with acrylic groups content of 10% and solid content of 15% at different absorbed doses; **C** Spectra of inverse opal films with acrylic groups content of 30% and solid content of 15% at different absorbed doses.

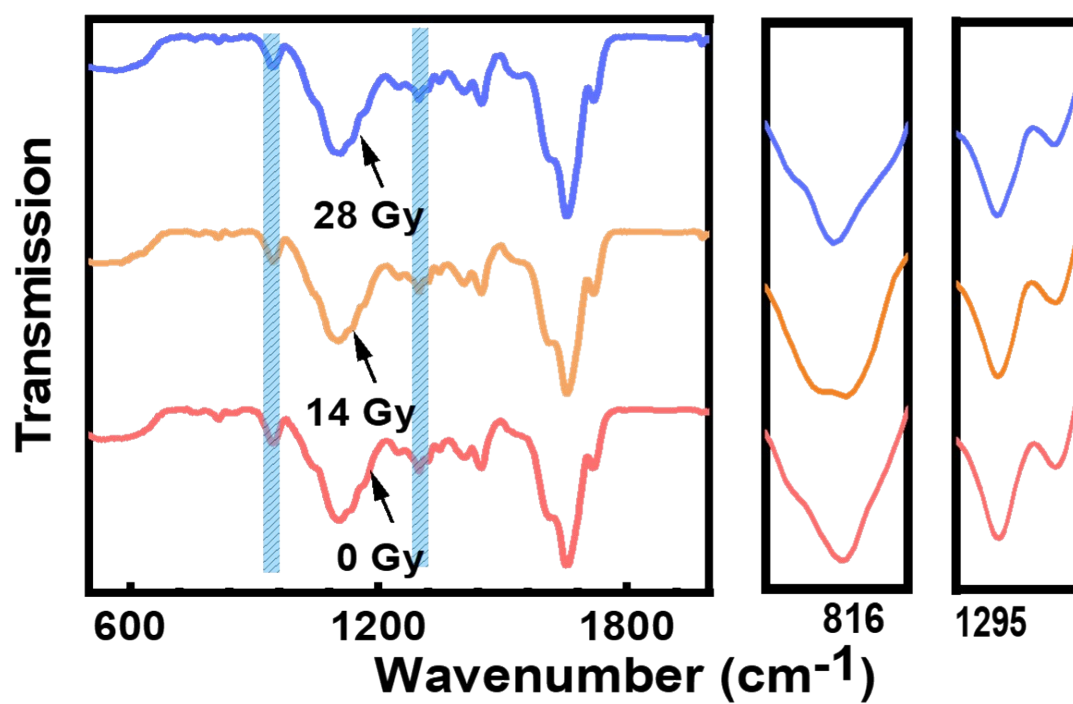

**Figure S5.** FT-IR of modified films with absorbed dose at 0, 10, 20 Gy and unmodified film (815 - C=CH<sub>2</sub> CH Out-of-plane bending vibration; 1297 -C=CH<sub>2</sub> in-plane bending vibration).

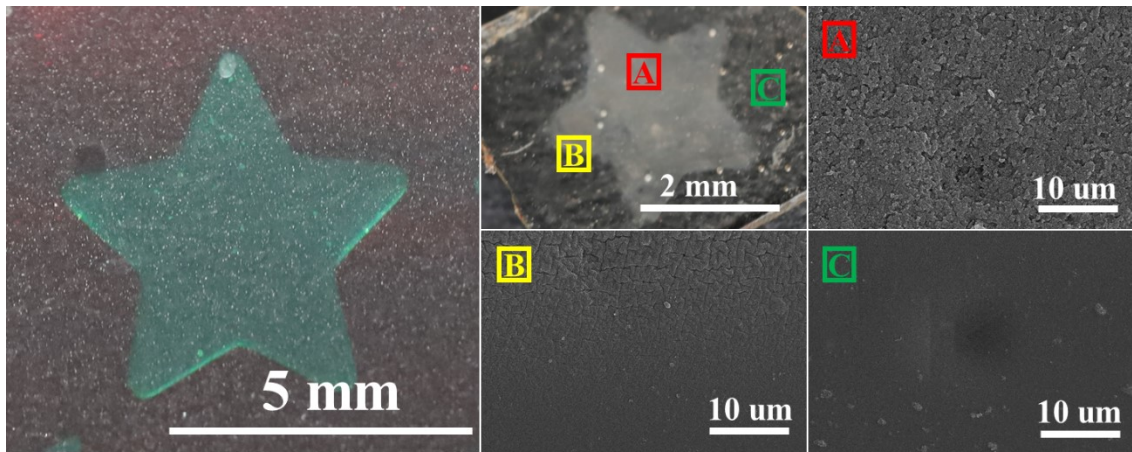

**Figure S6.** SEM images of different areas of the sample after drying.

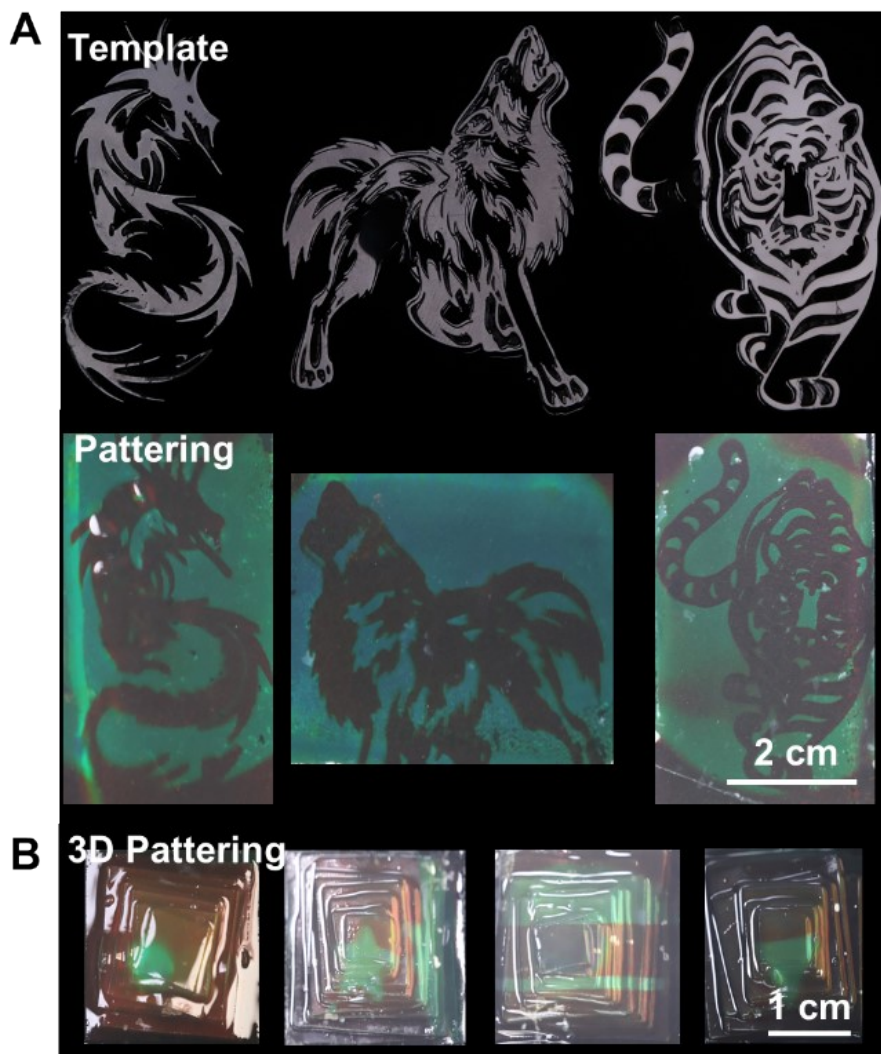

**Figure S7.** **A** Digital photo of films irradiated in the patterned radiation field; **B** 3D model of superimposed films and irradiated in different patterned radiation field.

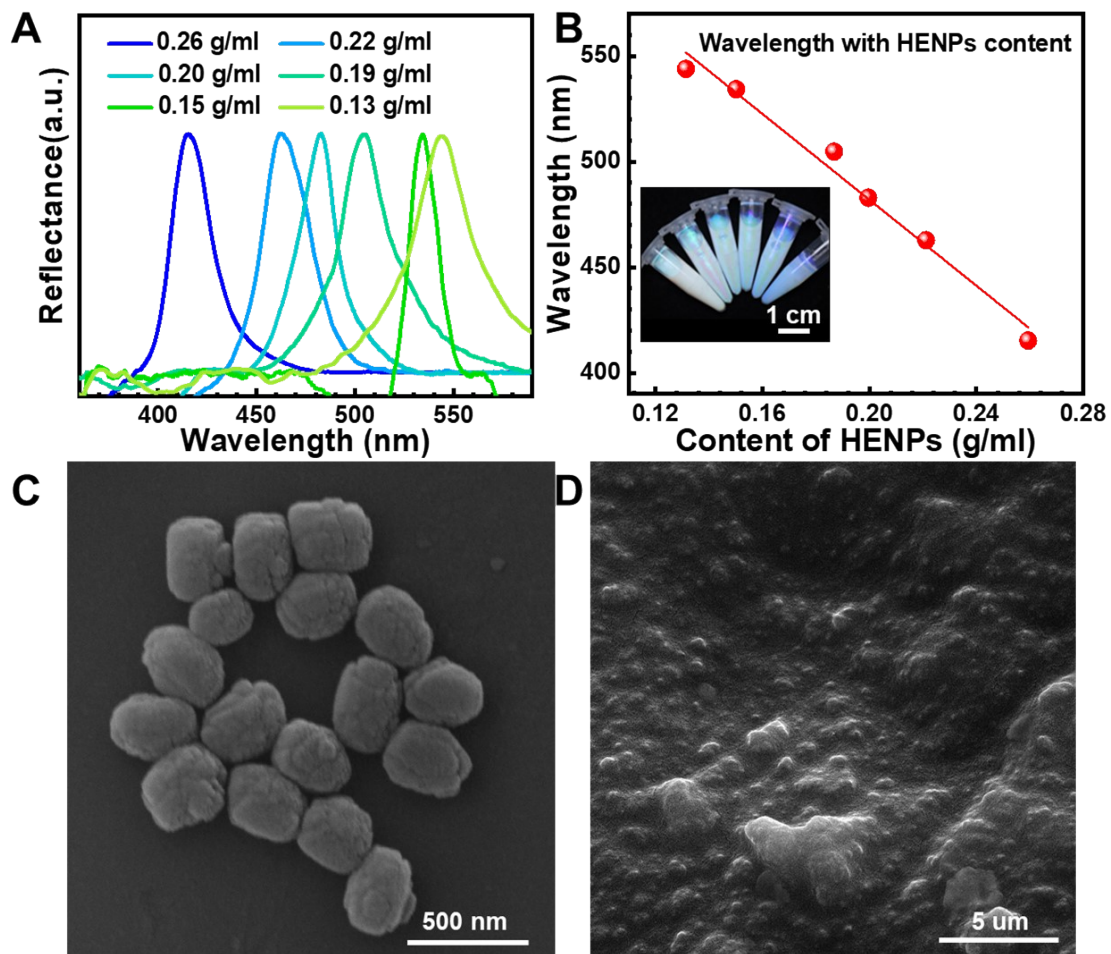

**Figure S8.** **A** The reflective spectrum of the HENPs with different mass volume fraction; **B** Linear fit of Bragg peaks wavelength with different mass volume fraction, with insets showing their corresponding Photographs; **C** SEM images of the HENPs; **D** SEM image of the HENPs in polymers.



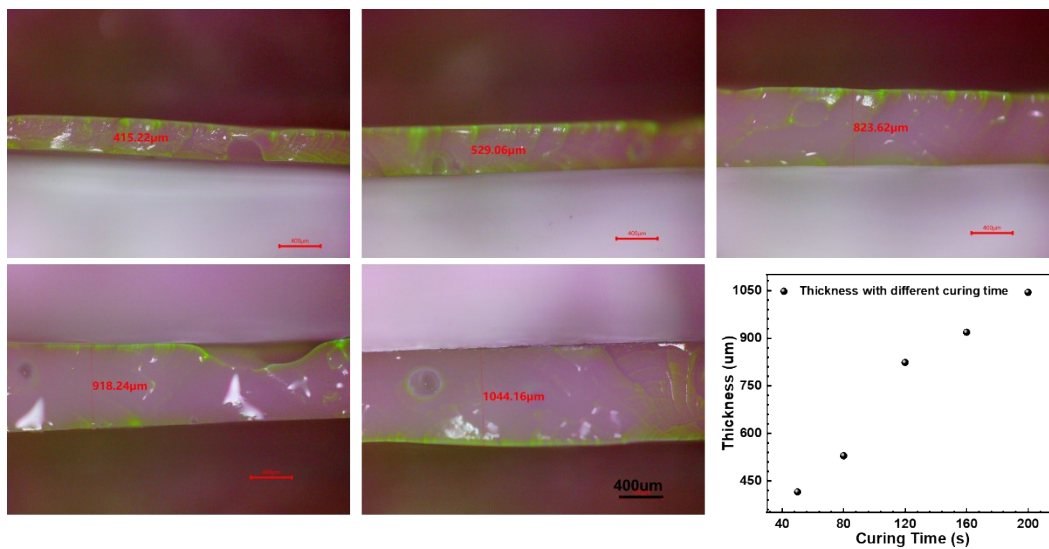

**Figure S9.** 3D printing curing depth for different curing times.

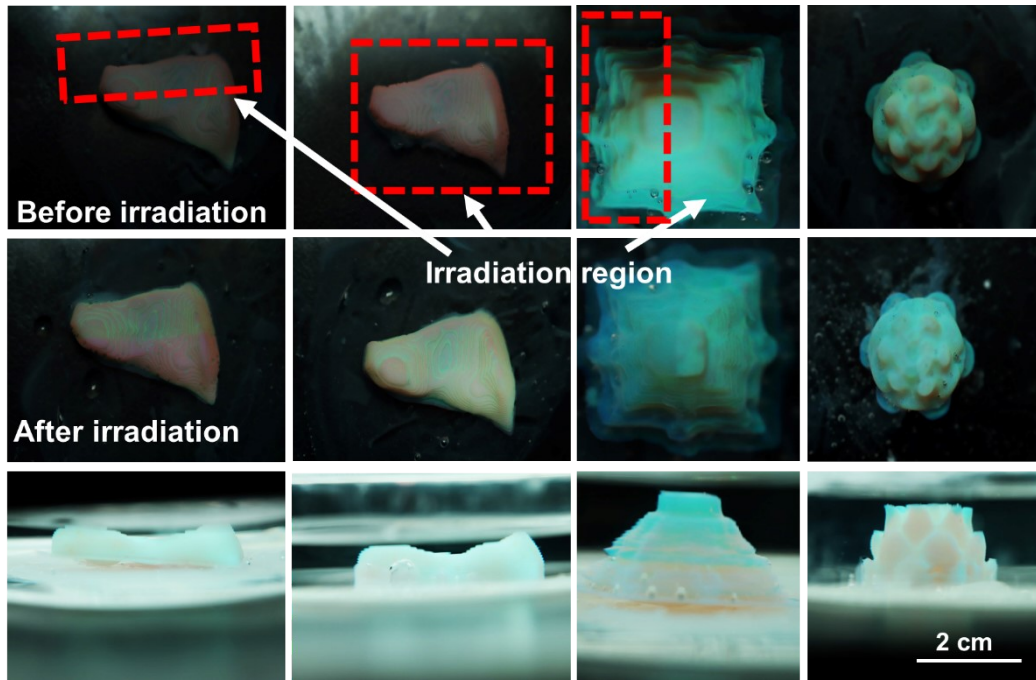

**Figure S10.** Photographs of 3D models before and after irradiation under different patterned radiation fields.
